# Supplementary material for: A Fast Method for the Simultaneous Analysis of 26 Beta-Agonists in Swine Muscle with a Multi-Functional Filter by Ultra-High Performance Liquid Chromatography-Tandem Mass Spectrometry
Source: MDPI journal article supplement (doi:10.3390/separations9050121), 2022-05-13
Supplement: s1 [file s1]

## Supplementary material

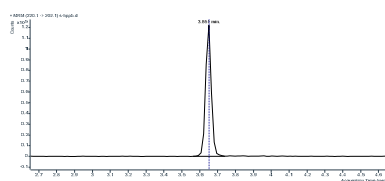

Cimaterol

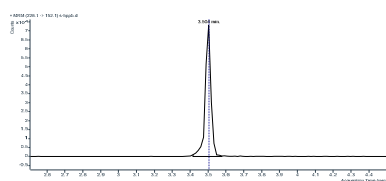

Terbutaline

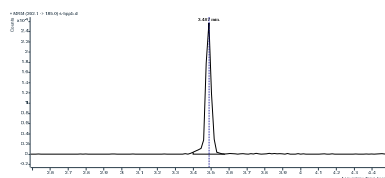

Zilpaterol

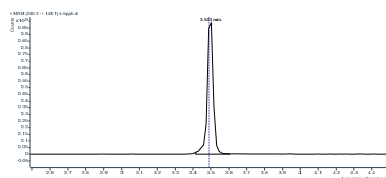

Salbutamol

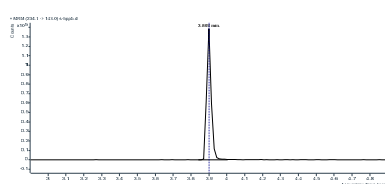

Cimbuterol

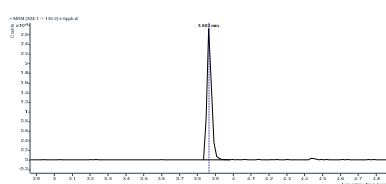

Fenoterol

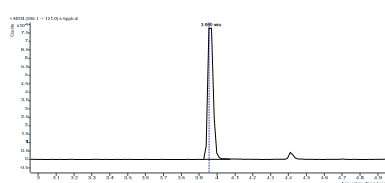

Ritodrine

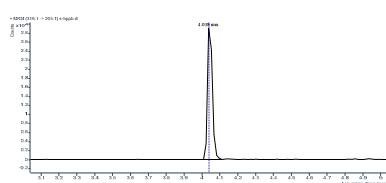

Clencyclohexerol

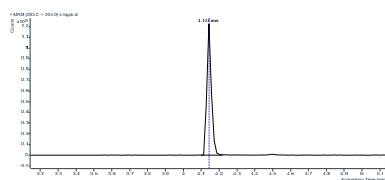

Clenbuterolhydroxymethyl

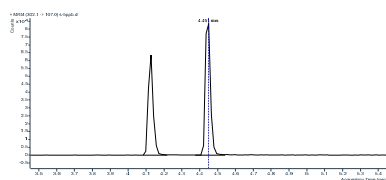

Isoxsuprine

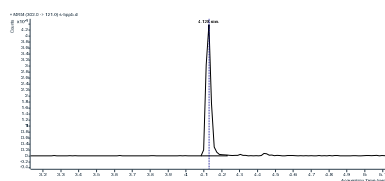

Ractopamine

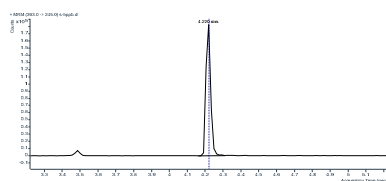

Clenproperol

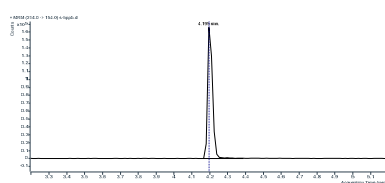

Clorprenaline

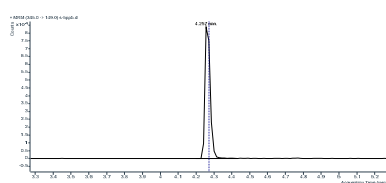

Formoterol

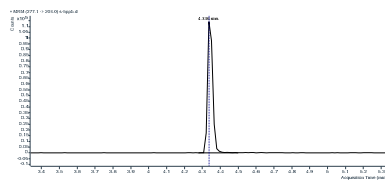

Clenbuterol

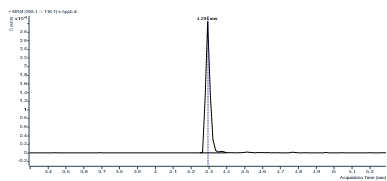

Metoprolol Tartrate

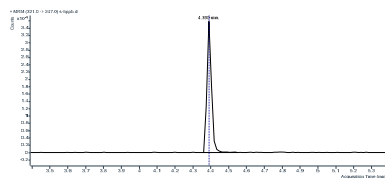

Bromchlorbuterol

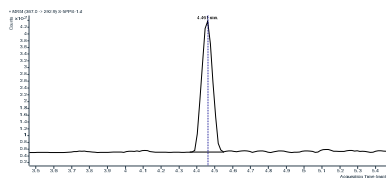

Bromobuterol

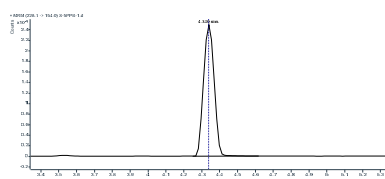

Tulobuterol

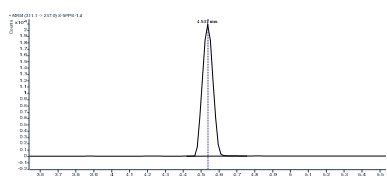

Mabuterol

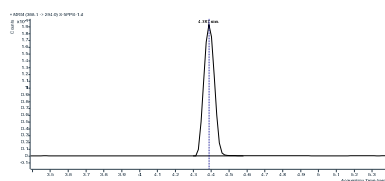

Bambuterol

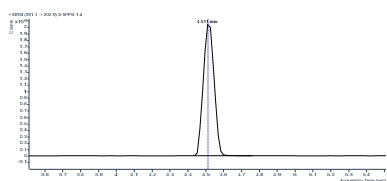

Clenpenterol

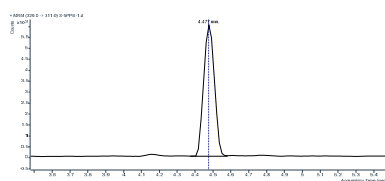

Labetalol

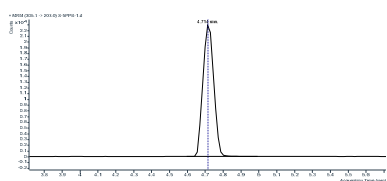

Clenhexerol

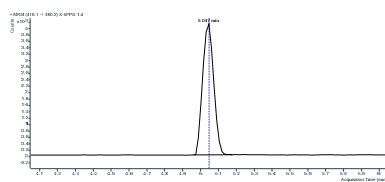

Salmeterol

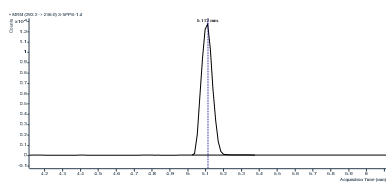

penbutolol

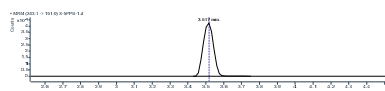

Salbutamol-d3

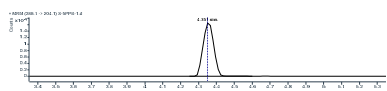

Clenbuterol-d9

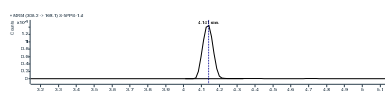

Ractopamine-d6

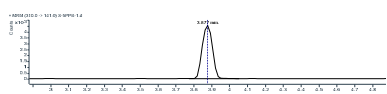

Fenoterol-d6

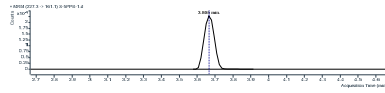

Cimaterol-d7

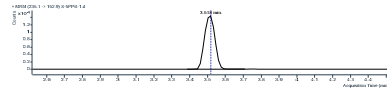

Terbutaline-d9

Figure S1 Extracted ion chromatogram (EIC) of 26 beta-agonists and ISs. Concentration levels: 5 µg/L of 26 beta-agonists and ISs

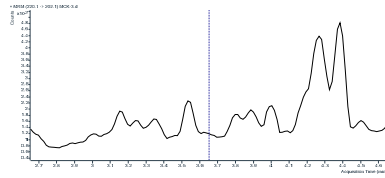

Cimaterol

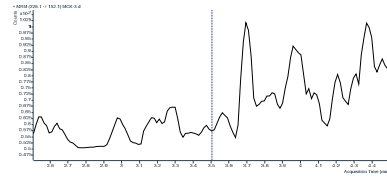

Terbutaline

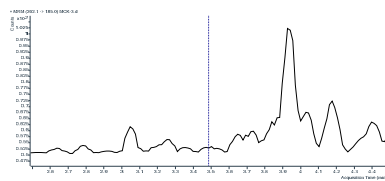

Zilpatanol

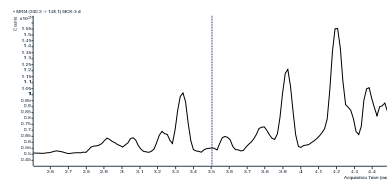

Salbutamol

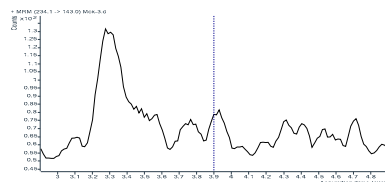

Cimbuterol

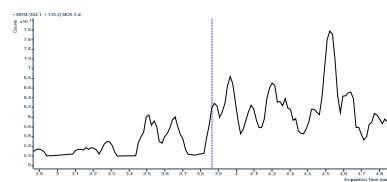

Fenoterol

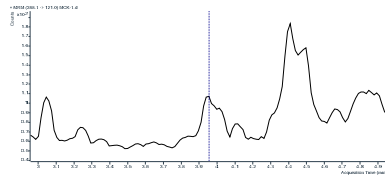

Ritodrine

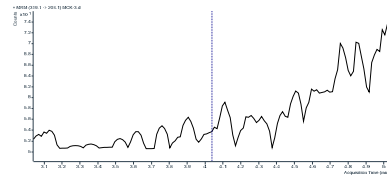

Clencyclohexerol

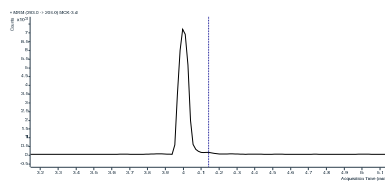

Clenbuterolhydroxymethyl

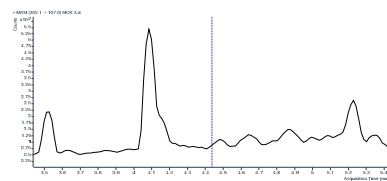

Isoxsuprine

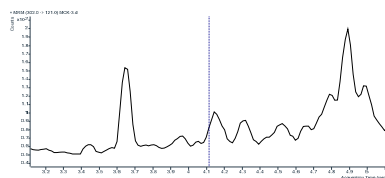

Ractopamine

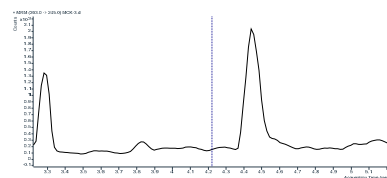

Clenproperol

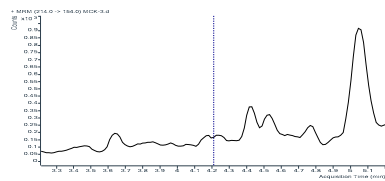

Clorprenaline

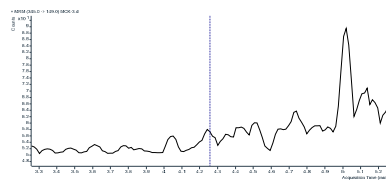

Formoterol

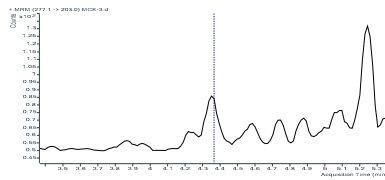

Clenbuterol

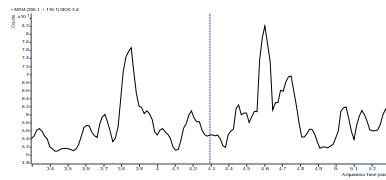

Metoprolol Tartrate

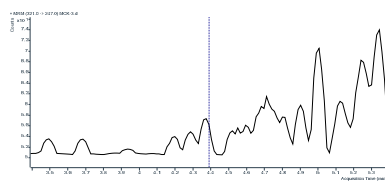

Bromchlorbuterol

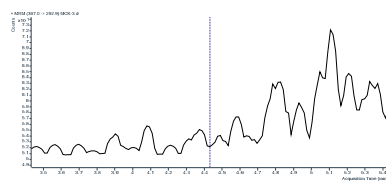

Bromobuterol

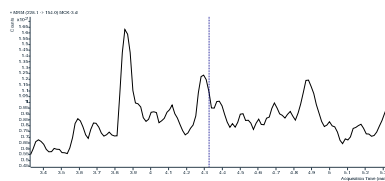

Tulobuterol

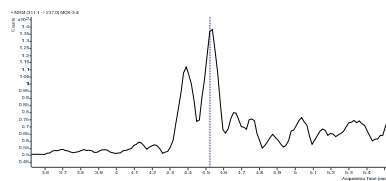

Mabuterol

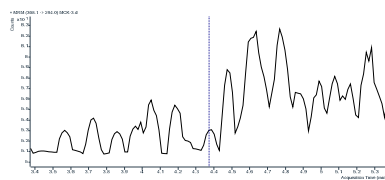

Bambuterol

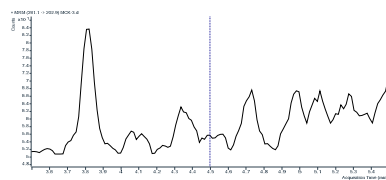

Clenpenterol

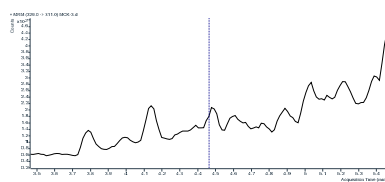

Labetalol

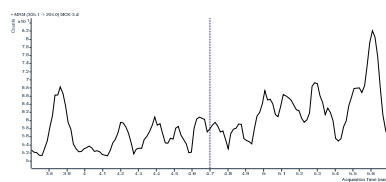

Clenhexerol

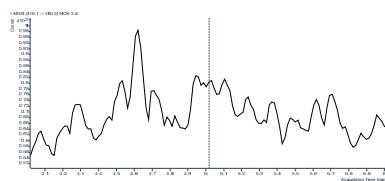

Salmeterol

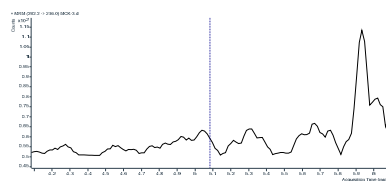

penbutolol

Figure S2 Chromatograms of 20 blank samples derived from different origins

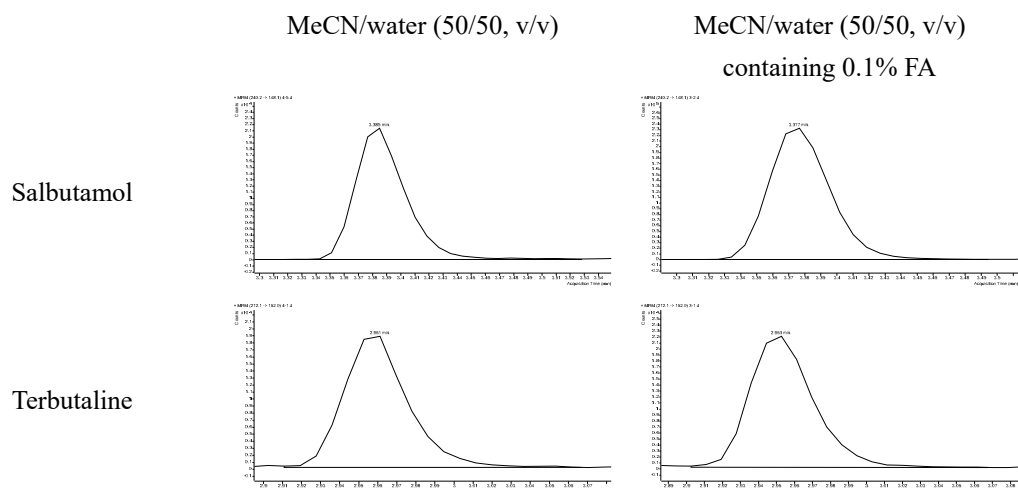

Figure S3 Chromatograms of Salbutamol and Terbutaline extract from swine samples by using different redissolved solvent.

Table S1. Ion ratios of two transition products in solvent standard and fortified matrix for 26 beta-agonists.

| Analyte                  | ion ratios in standards (%) | ion ratios in pork-based samples (%) | Relative Deviation (%) |
|--------------------------|-----------------------------|--------------------------------------|------------------------|
| Cimaterol                | 44.8                        | 43.9                                 | 0.9                    |
| Terbutaline              | 31.3                        | 31.4                                 | -0.1                   |
| Zilpaterol               | 55.4                        | 57.4                                 | -2.0                   |
| Salbutamol               | 30.3                        | 31.1                                 | -0.8                   |
| Cimbuterol               | 38.1                        | 37.6                                 | 0.5                    |
| Fenoterol                | 3.8                         | 4.1                                  | -0.3                   |
| Ritodrine                | 60.2                        | 60.2                                 | 0.0                    |
| Clencyclohexerol         | 50.0                        | 49.7                                 | 0.3                    |
| Clenbuterolhydroxymethyl | 91.5                        | 93.2                                 | -1.7                   |
| Isoxsuprine              | 42.9                        | 44.1                                 | -1.2                   |
| Ractopamine              | 88.7                        | 91.5                                 | -2.8                   |
| Clenproperol             | 25.7                        | 25.6                                 | 0.1                    |
| Clorprenaline            | 31.2                        | 30.9                                 | 0.3                    |
| Formoterol               | 19.6                        | 20.3                                 | -0.7                   |
| Clenbuterol              | 42.5                        | 42.9                                 | -0.4                   |
| Metoprolol Tartrate      | 45.7                        | 42.8                                 | 2.9                    |
| Bromchlorbuterol         | 12.5                        | 13.1                                 | -0.6                   |
| Bromobuterol             | 35.0                        | 35.3                                 | -0.3                   |
| Tulobuterol              | 8.3                         | 8.3                                  | 0.0                    |
| Mabuterol                | 37.5                        | 36.6                                 | 0.9                    |
| Bambuterol               | 9.3                         | 9.3                                  | 0.0                    |
| Clenpenterol             | 18.4                        | 17.7                                 | 0.7                    |
| Labetalol                | 20.0                        | 20.2                                 | -0.2                   |
| Clenhexerol              | 34.5                        | 34.9                                 | -0.4                   |
| Salmeterol               | 95.1                        | 96.0                                 | -0.9                   |
| penbutolol               | 27.5                        | 27.3                                 | 0.2                    |
